# Supplementary material for: Construction of Core–Shell CoMoO4@γ-FeOOH Nanosheets for Efficient Oxygen Evolution Reaction
Source: MDPI journal article supplement (doi:10.3390/nano12132215), 2022-06-28
Supplement: s1 [file s1]

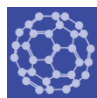

## Supplementary Materials

# Construction of Core–Shell $\text{CoMoO}_4@ \gamma\text{-FeOOH}$ Nanosheets for Efficient Oxygen Evolution Reaction

Huijun Song <sup>1,†</sup>, Jingjing Li <sup>1,†</sup>, Guan Sheng <sup>2,†</sup>, Yinling Zhang <sup>1</sup>, Ahmad Azmin Mohamad <sup>2</sup>, Juan Luo <sup>1</sup>, Zhangnan Zhong <sup>1</sup> and Wei Shao <sup>1,\*</sup>

<sup>1</sup> State Key Laboratory Breeding Base of Green Chemistry Synthesis Technology, College of Chemical Engineering, Zhejiang University of Technology, Hangzhou 310014, China; huijunsong@126.com (H.S.); 18855492938@163.com (J.L.); 2111901117@zjut.edu.cn (Y.Z.); luojuang2021@163.com (J.L.); zhongzhangnan@126.com (Z.Z.)

<sup>2</sup> School of Materials and Mineral Resources Engineering, Universiti Sains Malaysia, Nibong Tebal 14300, Penang, Malaysia; shengguan@student.usm.my (G.S.); aam@usm.my (A.A.M.)

\* Correspondence: weishao@zjut.edu.cn

† These authors contributed equally to this work.

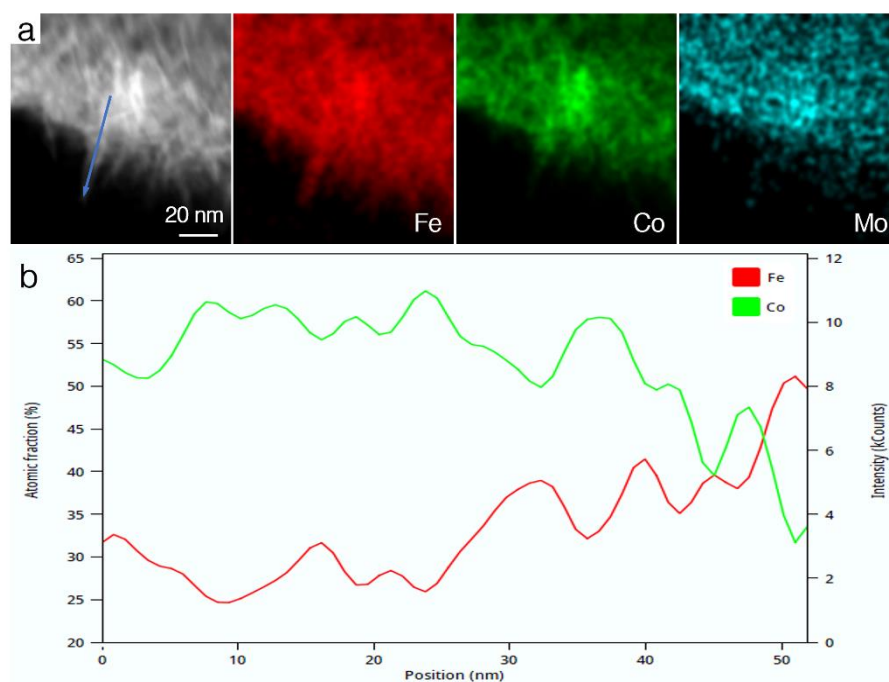

**Figure S1.** (a) HAADF STEM and EDS mapping images of  $\text{CoMoO}_4@ \gamma\text{-FeOOH}$ . (b) EDS Line scan spectrum of the area marked with blue arrow in (a).

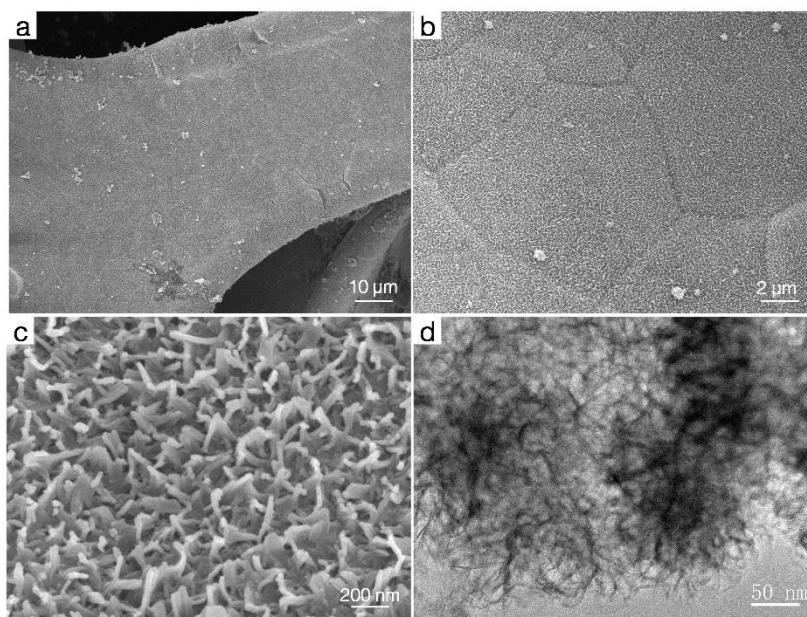

**Figure S2.** (a) Low-and (b,c) high-magnification SEM images of  $\gamma$ -FeOOH. (d) TEM image of  $\gamma$ -FeOOH powder synthesized without Ni foam substrate.

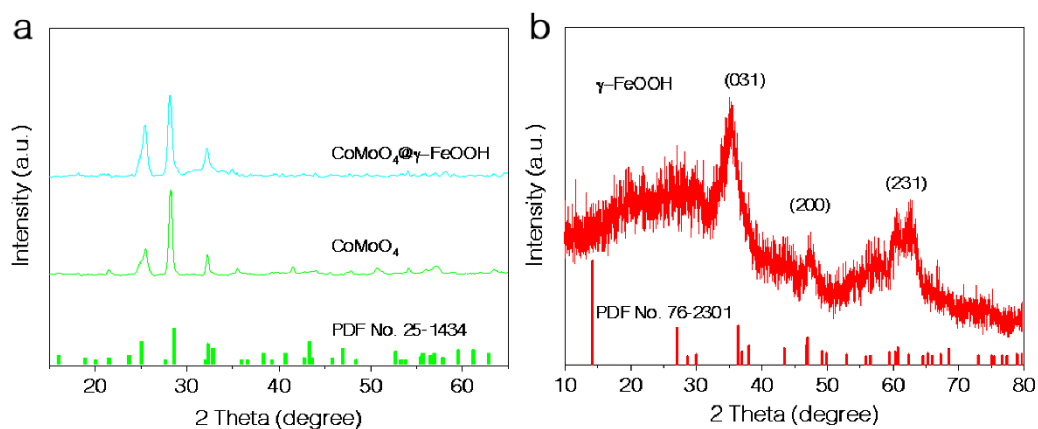

**Figure S3.** (a) XRD patterns of  $\text{CoMoO}_4$  and  $\text{CoMoO}_4@ \gamma\text{-FeOOH}$ . (b) XRD pattern of  $\gamma\text{-FeOOH}$ .

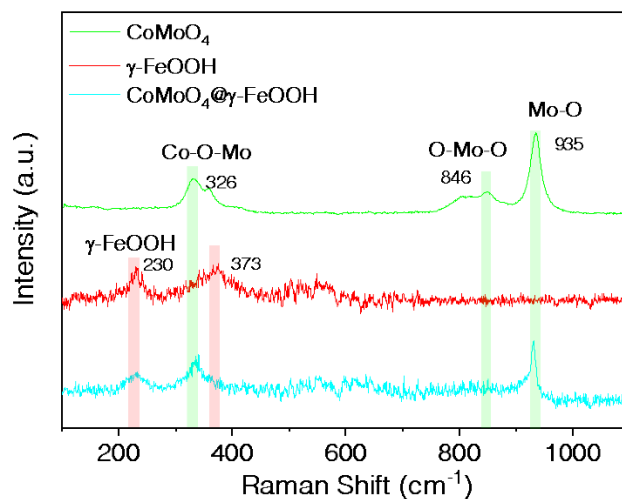

**Figure S4.** Raman spectra of  $\text{CoMoO}_4$ ,  $\text{CoMoO}_4@ \gamma\text{-FeOOH}$  and  $\gamma\text{-FeOOH}$ .

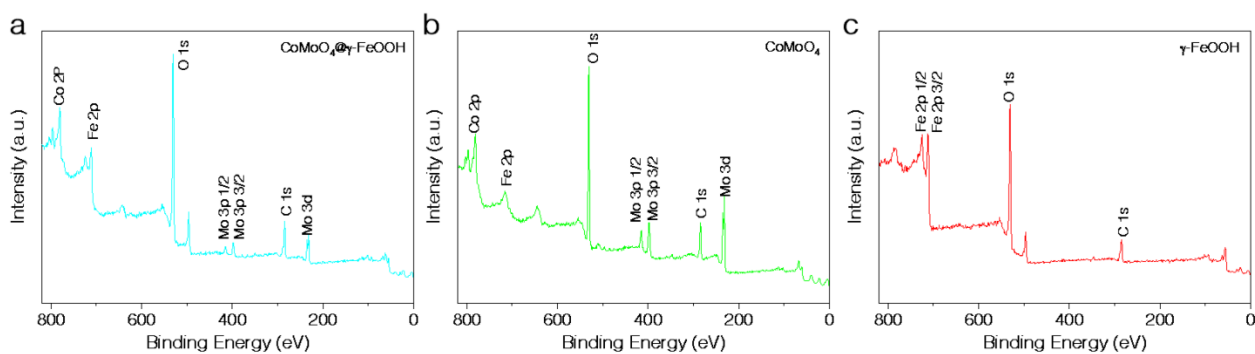

**Figure S5.** XPS survey spectra of (a)  $\text{CoMoO}_4@ \gamma\text{-FeOOH}$ , (b)  $\text{CoMoO}_4$  and (c)  $\gamma\text{-FeOOH}$ .

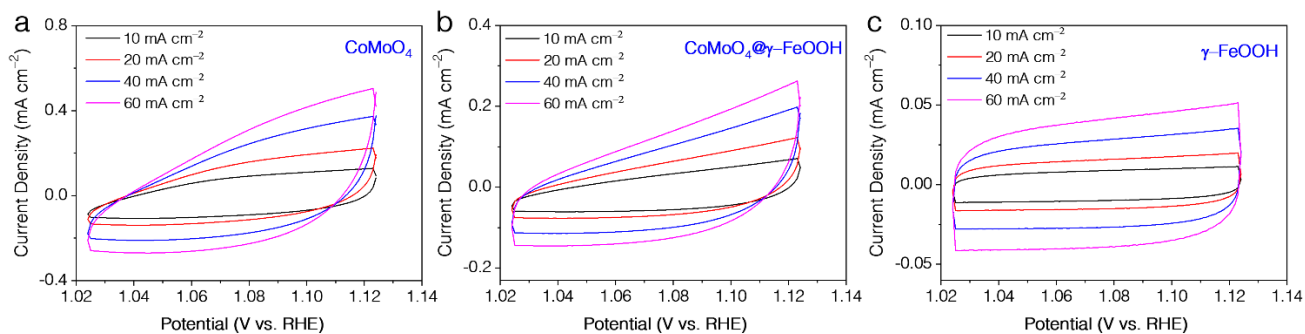

**Figure S6.** CV curves of (a)  $\text{CoMoO}_4$ , (b)  $\text{CoMoO}_4@ \gamma\text{-FeOOH}$ , and (c)  $\gamma\text{-FeOOH}$  acquired at various scan rates.

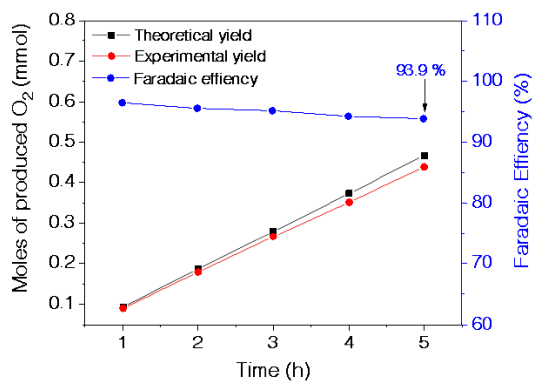

**Figure S7.** Faradaic efficiency of  $\text{CoMoO}_4@ \gamma\text{-FeOOH}$  for the theoretically calculated and experimentally measured  $\text{O}_2$  at a current density of 10  $\text{mA cm}^{-2}$ .

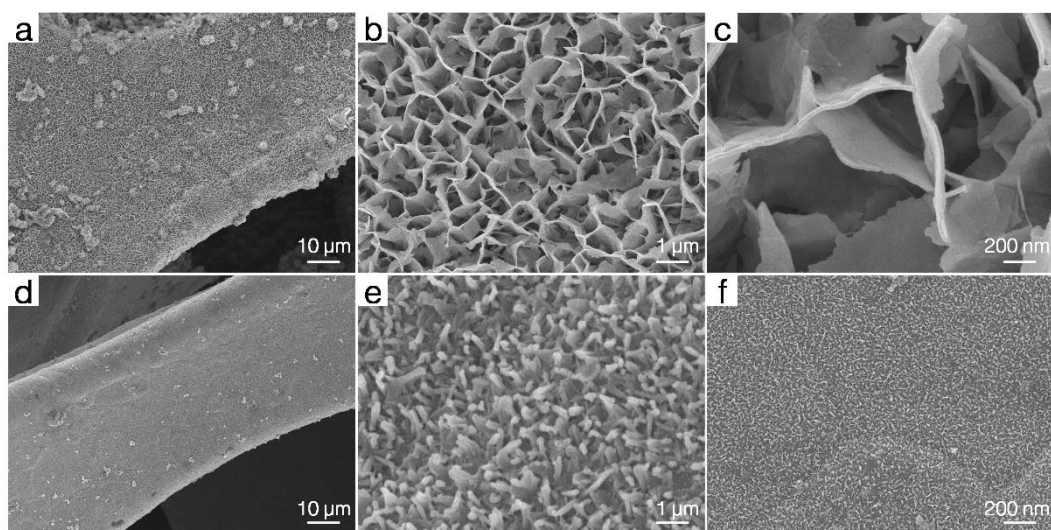

Figure S8. SEM images of catalysts after LSV test; (a–c)  $\text{CoMoO}_4$ , (d–f)  $\gamma\text{-FeOOH}$ .

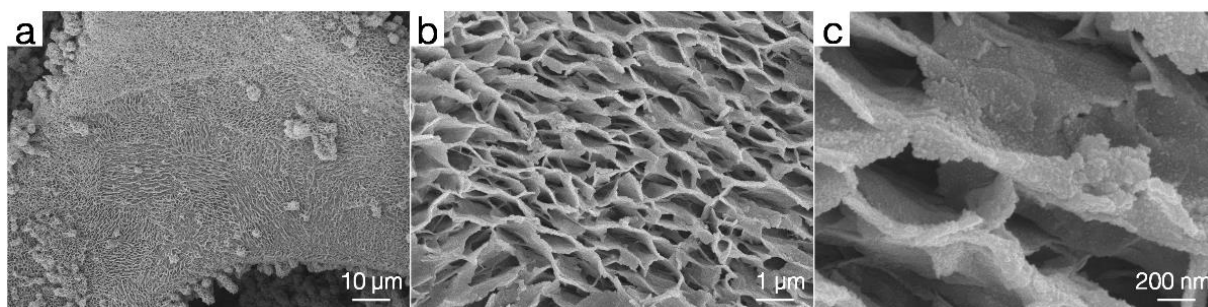

Figure S9. (a–c) SEM images of  $\text{CoMoO}_4@\gamma\text{-FeOOH}$  after LSV test.

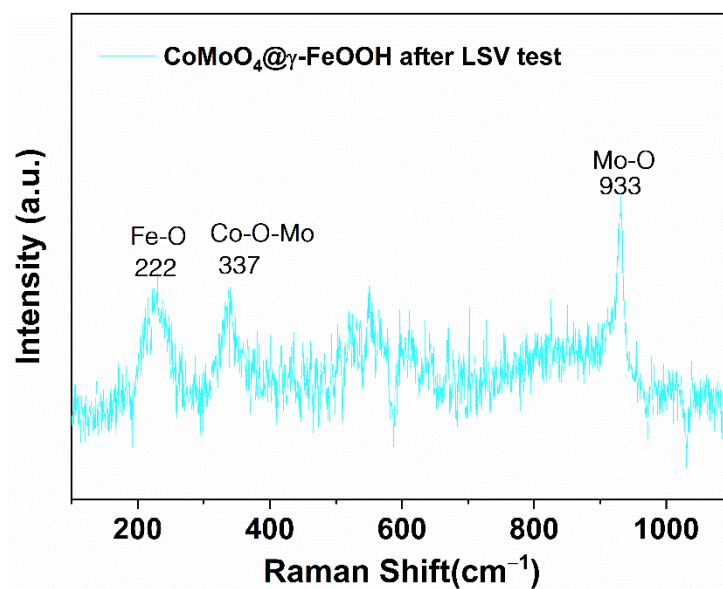

Figure S10. Raman spectra of  $\text{CoMoO}_4@\gamma\text{-FeOOH}$  after LSV test.



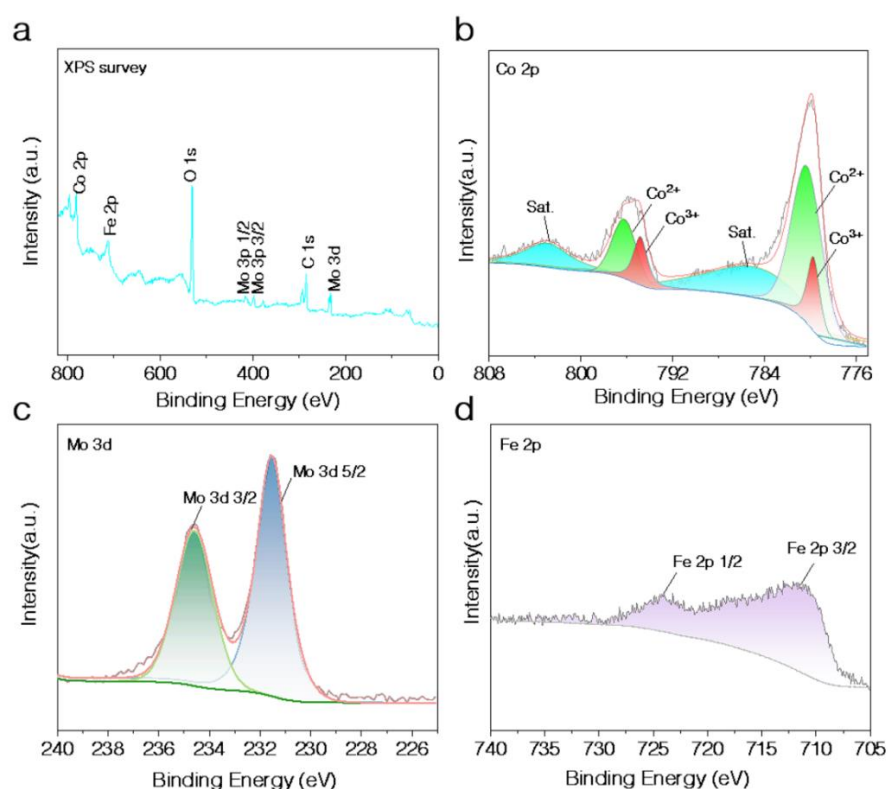

**Figure S11.** (a) XPS survey spectrum, (b) high-resolution Co 2p XPS spectrum, (c) high-resolution Mo 3d XPS spectrum, (d) high-resolution Fe 2p XPS spectrum of CoMoO<sub>4</sub>@γ-FeOOH after LSV test.

**Table S1.** Comparison of OER performances between CoMoO<sub>4</sub>@γ-FeOOH electrode and recently reported electrocatalysts in alkaline solution.

| Catalyst                                                             | Substrate        | Overpotential (mV)                             | Tafel Slope (mV dec <sup>-1</sup> ) | Stability                            | Ref.             |
|----------------------------------------------------------------------|------------------|------------------------------------------------|-------------------------------------|--------------------------------------|------------------|
| CoMoO <sub>4</sub> @γ-FeOOH                                          | <sup>a</sup> NF  | 243, 270, 279 @10, 50, 100 mA cm <sup>-2</sup> | 46.7                                | 36 h@10, 50, 100 mA cm <sup>-2</sup> | <b>This work</b> |
| NiFe <sub>2</sub> O <sub>4-x</sub> /NMO-25                           | NF               | 262, 304@10, 100 mA cm <sup>-2</sup>           | 42.7                                | 40 h@200 mA cm <sup>-2</sup>         | [1]              |
| Ni <sub>3</sub> S <sub>2</sub> @MoS <sub>2</sub> /FeOOH              | NF               | 260@10 mA cm <sup>-2</sup>                     | 49                                  | 24 h@10mA cm <sup>-2</sup>           | [2]              |
| CoFe LDH-F                                                           | NF               | 300@10 mA cm <sup>-2</sup>                     | 47                                  | 35 h@10 mA cm <sup>-2</sup>          | [3]              |
| Fe-NiO/NF                                                            | NF               | 264, 336@10, 100 mA cm <sup>-2</sup>           | 65.3                                | 12 h@60mA cm <sup>-2</sup>           | [4]              |
| Ni <sub>3</sub> S <sub>2</sub> /MnO <sub>2</sub>                     | NF               | 260, 348@10, 100 mA cm <sup>-2</sup>           | 61                                  | 48 h@100 mA cm <sup>-2</sup>         | [5]              |
| Amorphous (Fe-Ni) Co <sub>x</sub> -OH/Ni <sub>3</sub> S <sub>2</sub> | NF               | 280@100 mA cm <sup>-2</sup>                    | 57                                  | 100 h@200 mA cm <sup>-2</sup>        | [6]              |
| PA-NiO                                                               | NF               | 310@100 mA cm <sup>-2</sup>                    | 36                                  | 7 h@100 mA cm <sup>-2</sup>          | [7]              |
| Mo-NiOOH                                                             | NF               | 390@ 100 mA cm <sup>-2</sup>                   | 68                                  | 24 h@100mA cm <sup>-2</sup>          | [8]              |
| Ni <sub>5</sub> Co <sub>3</sub> Mo-OH                                | NF               | 304@100 mA cm <sup>-2</sup>                    | 56.4                                | 100 h@100 mA cm <sup>-2</sup>        | [9]              |
| Mo-CoOOH                                                             | <sup>b</sup> CC  | 305, 365@10, 100 mA cm <sup>-2</sup>           | 56                                  | 20 h@40 mA cm <sup>-2</sup>          | [10]             |
| NiO@Ni/WS <sub>2</sub>                                               | CC               | 380@50 mA cm <sup>-2</sup>                     | 108.9                               | 40 h@50mA cm <sup>-2</sup>           | [11]             |
| Mo <sub>51</sub> Ni <sub>40</sub> Fe <sub>9</sub>                    | <sup>c</sup> GCE | 257@10 mA cm <sup>-2</sup>                     | 51                                  | 18 h@10 mA cm <sup>-2</sup>          | [12]             |
| CoMoOS NBs                                                           | GCE              | 281@10 mA cm <sup>-2</sup>                     | 75.4                                | 40 h@10 mA cm <sup>-2</sup>          | [13]             |

<sup>a</sup> NF; nickel foam, <sup>b</sup> CC; carbon cloth, <sup>c</sup> GCE; glassy carbon electrode.

## References

1. Choi, J.; Kim, D.; Zheng, W.; Yan, B.; Li, Y.; Lee, L.Y.S.; Piao, Y. Interface engineered NiFe<sub>2</sub>O<sub>4-x</sub>/NiMoO<sub>4</sub> nanowire arrays for electrochemical oxygen evolution. *Appl. Catal. B: Environ.* **2021**, *286*, 119857, <https://doi.org/10.1016/j.apcatb.2020.119857>.
2. Zheng, M.; Guo, K.; Jiang, W.-J.; Tang, T.; Wang, X.; Zhou, P.; Du, J.; Zhao, Y.; Xu, C.; Hu, J.-S. When MoS<sub>2</sub> meets FeOOH: A “one-stone-two-birds” heterostructure as a bifunctional electrocatalyst for efficient alkaline water splitting. *Appl. Catal. B: Environ.* **2018**, *244*, 1004–1012, <https://doi.org/10.1016/j.apcatb.2018.12.019>.
3. Liu, P.F.; Yang, S.; Zhang, B.; Yang, H. Defect-Rich Ultrathin Cobalt–Iron Layered Double Hydroxide for Electrochemical Overall Water Splitting. *ACS Appl. Mater. Interfaces* **2016**, *8*, 34474–34481, <https://doi.org/10.1021/acsami.6b12803>.
4. Qiu, Z.; Ma, Y.; Edvinsson, T. In operando Raman investigation of Fe doping influence on catalytic NiO intermediates for enhanced overall water splitting. *Nano Energy* **2019**, *66*, 104118, <https://doi.org/10.1016/j.nanoen.2019.104118>.
5. Xiong, Y.; Xu, L.; Jin, C.; Sun, Q. Interface-engineered atomically thin Ni<sub>3</sub>S<sub>2</sub>/MnO<sub>2</sub> heterogeneous nanoarrays for efficient overall water splitting in alkaline media. *Appl. Catal. B: Environ.* **2019**, *254*, 329–338, <https://doi.org/10.1016/j.apcatb.2019.05.017>.
6. Che, Q.; Li, Q.; Chen, X.; Tan, Y.; Xu, X. Assembling amorphous (Fe-Ni)Co<sub>x</sub>-OH/Ni<sub>3</sub>S<sub>2</sub> nanohybrids with S-vacancy and interfacial effects as an ultra-highly efficient electrocatalyst: Inner investigation of mechanism for alkaline water-to-hydrogen/oxygen conversion. *Appl. Catal. B: Environ.* **2019**, *263*, 118338, <https://doi.org/10.1016/j.apcatb.2019.118338>.
7. Li, Z.; Niu, W.; Zhou, L.; Yang, Y. Phosphorus and Aluminum Codoped Porous NiO Nanosheets as Highly Efficient Electrocatalysts for Overall Water Splitting. *ACS Energy Lett.* **2018**, *3*, 892–898, <https://doi.org/10.1021/acsenerylett.8b00174>.
8. Jin, Y.; Huang, S.; Yue, X.; Shu, C.; Shen, P.K. Highly stable and efficient non-precious metal electrocatalysts of Mo-doped NiOOH nanosheets for oxygen evolution reaction. *Int. J. Hydrogen Energy* **2018**, *43*, 12140–12145, <https://doi.org/10.1016/j.ijhydene.2018.04.181>.
9. Hao, S.; Chen, L.; Yu, C.; Yang, B.; Li, Z.; Hou, Y.; Lei, L.; Zhang, X. NiCoMo Hydroxide Nanosheet Arrays Synthesized via Chloride Corrosion for Overall Water Splitting. *ACS Energy Lett.* **2019**, *4*, 952–959, <https://doi.org/10.1021/acsenerylett.9b00333>.
10. Guan, C.; Xiao, W.; Wu, H.; Liu, X.; Zang, W.; Zhang, H.; Ding, J.; Feng, Y.P.; Pennycook, S.J.; Wang, J. Hollow Mo-doped CoP nanoarrays for efficient overall water splitting. *Nano Energy* **2018**, *48*, 73–80, <https://doi.org/10.1016/j.nanoen.2018.03.034>.
11. Wang, D.; Li, Q.; Han, C.; Xing, Z.; Yang, X. When NiO@Ni Meets WS<sub>2</sub> Nanosheet Array: A Highly Efficient and Ultrastable Electrocatalyst for Overall Water Splitting. *ACS Central Sci.* **2017**, *4*, 112–119, <https://doi.org/10.1021/acscentsci.7b00502>.
12. Luo, X.; Shao, Q.; Pi, Y.; Huang, X. Trimetallic Molybdate Nanobelts as Active and Stable Electrocatalysts for the Oxygen Evolution Reaction. *ACS Catal.* **2018**, *9*, 1013–1018, <https://doi.org/10.1021/acscatal.8b04521>.
13. Xu, H.; Shang, H.; Wang, C.; Jin, L.; Chen, C.; Wang, C.; Du, Y. Three-dimensional open CoMoO<sub>x</sub>/CoMoS<sub>x</sub>/CoS<sub>x</sub> nanobox electrocatalysts for efficient oxygen evolution reaction. *Appl. Catal. B: Environ.* **2020**, *265*, 118605, <https://doi.org/10.1016/j.apcatb.2020.118605>.
